# Supplementary material for: Inflammation-related plasma protein levels and association with adiposity measurements in young adults
Source: PubMed Central journal article supplement (PMC8166979; doi:10.1038/s41598-021-90843-x), 2021-05-31
Supplement: 41598_2021_90843_MOESM1_ESM.pdf [file 41598_2021_90843_MOESM1_ESM.pdf]

## SUPPLEMENT

### Inflammation-related plasma protein levels and association with adiposity measurements in young adults

Klevebro S, Björkander S, Ekström S, Merid SK, Gruzieva O, Mälarstig A, Johansson Å, Kull I, Bergström A, Melén E

**Table S1.** Comparison of characteristics among the study population and participants in the BAMSE cohort not fulfilling the inclusion criteria

**Table S2.** Levels of the 71 inflammatory proteins included in the analyses by sex

**Table S3.** Association between body composition measurements and protein levels

**Table S4.** Association between %BF and protein levels stratified by three BMI categories

**Table S5.** Association between %BF and protein levels adjusted for physical activity

**Table S6.** Full and alternative protein names

**Table S1.** Comparison of characteristics among the study population and participants in the BAMSE cohort not fulfilling the inclusion criteria

|                                                                  | <b>Included in study<br/>population<br/>(n=2074)</b> | <b>Not included in study<br/>population<br/>(n=2015)</b> |                             |
|------------------------------------------------------------------|------------------------------------------------------|----------------------------------------------------------|-----------------------------|
|                                                                  | <i>n (%)</i>                                         | <i>n (%)</i>                                             | <i>P-value</i> <sup>1</sup> |
| <i>Male sex<br/>(n=4089)</i>                                     | 927 (44.7)                                           | 1138 (56.5)                                              | <0.001                      |
| <i>Parental professional worker at<br/>baseline (n=4018)</i>     | 1740 (85.4)                                          | 1583 (79.9)                                              | <0.001                      |
| <i>Maternal smoking in pregnancy<br/>and/or infancy (n=4086)</i> | 255 (12.3)                                           | 308 (15.3)                                               | <0.001                      |
| <i>Any parent born outside of<br/>Scandinavia (n=3398)</i>       | 281 (15.1)                                           | 262 (17.1)                                               | 0.11                        |
| <i>Breastfeeding ≥4 months<br/>(n=3919)</i>                      | 1621 (80.3)                                          | 1495 (78.7)                                              | 0.21                        |
| <i>High physical activity level at 16<br/>years (n=2923)</i>     | 1181 (67.3)                                          | 809 (69.3)                                               | 0.44                        |
| <i>Overweight at 16 years<br/>(n=2599)</i>                       | 241 (14.3)                                           | 178 (19.6)                                               | <0.001                      |

<sup>1</sup> P-values estimated using the chi-2 test

<sup>2</sup> Levels of physical activity according to IPAQ (International Physical Activity Questionnaire) guidelines. High: ≥7hours/week of moderate to vigorous activity or ≥ 3.5 hours/week of vigorous activity

**Table S2. Levels of the 71 inflammatory proteins included in the analyses by sex**

| Protein | Females (n=1147) |                       | Males (n=927) |                       | p-value               |
|---------|------------------|-----------------------|---------------|-----------------------|-----------------------|
|         | Mean (sd)        | Median (p25 - p75)    | Mean (sd)     | Median (p25 - p75)    |                       |
| 4EBP1   | 8.49 (0.85)      | 8.45 (7.92 - 9.00)    | 9.08 (0.87)   | 9.09 (8.59 - 9.65)    | <0.001 <sup>abc</sup> |
| ADA     | 5.59 (0.41)      | 5.55 (5.32 - 5.80)    | 5.82 (0.42)   | 5.78 (5.55 - 6.05)    | <0.001 <sup>abc</sup> |
| AXIN1   | 5.45 (0.89)      | 5.49 (4.97 - 5.98)    | 6.01 (0.93)   | 6.08 (5.60 - 6.58)    | <0.001 <sup>abc</sup> |
| CASP8   | 1.72 (0.51)      | 1.66 (1.43 - 1.92)    | 2.18 (0.59)   | 2.11 (1.80 - 2.52)    | <0.001 <sup>abc</sup> |
| CCL3    | 4.17 (0.51)      | 4.12 (3.86 - 4.40)    | 4.28 (0.44)   | 4.22 (3.98 - 4.53)    | 0.053 <sup>a</sup>    |
| CCL4    | 5.50 (0.53)      | 5.47 (5.15 - 5.79)    | 5.74 (0.55)   | 5.67 (5.37 - 6.06)    | 0.011 <sup>ab</sup>   |
| CCL11   | 6.19 (0.42)      | 6.18 (5.90 - 6.45)    | 6.40 (0.36)   | 6.37 (6.15 - 6.62)    | 0.141 <sup>a</sup>    |
| CCL19   | 8.78 (0.67)      | 8.67 (8.35 - 9.07)    | 8.79 (0.55)   | 8.71 (8.43 - 9.07)    | <0.001 <sup>abc</sup> |
| CCL20   | 6.38 (0.81)      | 6.28 (5.86 - 6.75)    | 6.46 (0.81)   | 6.34 (5.98 - 6.75)    | <0.001 <sup>abc</sup> |
| CCL23   | 10.06 (0.46)     | 10.06 (9.77 - 10.36)  | 10.03 (0.44)  | 10.03 (9.76 - 10.29)  | <0.001 <sup>abc</sup> |
| CCL25   | 5.70 (0.50)      | 5.71 (5.35 - 6.01)    | 5.82 (0.47)   | 5.79 (5.50 - 6.11)    | <0.001 <sup>abc</sup> |
| CCL28   | 2.06 (0.38)      | 2.02 (1.82 - 2.25)    | 1.91 (0.35)   | 1.88 (1.70 - 2.08)    | <0.001 <sup>abc</sup> |
| CD5     | 5.16 (0.46)      | 5.09 (4.88 - 5.31)    | 5.21 (0.46)   | 5.11 (4.92 - 5.36)    | <0.001 <sup>abc</sup> |
| CD6     | 5.46 (0.81)      | 5.33 (4.96 - 5.68)    | 5.60 (0.72)   | 5.45 (5.16 - 5.86)    | 0.011 <sup>ab</sup>   |
| CD8A    | 10.58 (0.57)     | 10.55 (10.20 - 10.96) | 10.57 (0.57)  | 10.56 (10.19 - 10.93) | <0.001 <sup>abc</sup> |
| CD40    | 11.72 (0.43)     | 11.70 (11.47 - 11.97) | 11.91 (0.44)  | 11.91 (11.66 - 12.18) | 0.721                 |
| CD244   | 7.20 (0.37)      | 7.18 (6.97 - 7.40)    | 7.37 (0.38)   | 7.35 (7.12 - 7.59)    | 0.543 <sup>abc</sup>  |
| CDCP1   | 2.16 (0.40)      | 2.11 (1.91 - 2.34)    | 2.14 (0.38)   | 2.10 (1.91 - 2.33)    | <0.001 <sup>abc</sup> |
| CSF1    | 9.86 (0.24)      | 9.83 (9.69 - 10.02)   | 9.75 (0.18)   | 9.75 (9.63 - 9.86)    | <0.001 <sup>bc</sup>  |
| CST5    | 4.94 (0.42)      | 4.92 (4.66 - 5.19)    | 5.01 (0.42)   | 4.96 (4.69 - 5.27)    | 0.669 <sup>a</sup>    |
| CX3CL1  | 5.71 (0.33)      | 5.71 (5.48 - 5.93)    | 5.71 (0.33)   | 5.70 (5.47 - 5.93)    | 0.002 <sup>abc</sup>  |
| CXCL1   | 9.25 (0.75)      | 9.35 (8.76 - 9.74)    | 9.35 (0.76)   | 9.43 (8.92 - 9.89)    | 0.472 <sup>a</sup>    |
| CXCL5   | 11.31 (0.98)     | 11.36 (10.69 - 11.99) | 11.29 (0.95)  | 11.33 (10.75 - 11.97) | 0.086 <sup>c</sup>    |
| CXCL6   | 8.78 (0.72)      | 8.76 (8.31 - 9.19)    | 9.14 (0.73)   | 9.10 (8.63 - 9.61)    | 0.539 <sup>a</sup>    |
| CXCL9   | 6.57 (0.78)      | 6.43 (6.08 - 6.85)    | 6.57 (0.73)   | 6.45 (6.13 - 6.84)    | <0.001 <sup>abc</sup> |

|                    |              |                       |              |                       |                       |
|--------------------|--------------|-----------------------|--------------|-----------------------|-----------------------|
| <i>CXCL10</i>      | 8.91 (0.84)  | 8.76 (8.40 - 9.18)    | 8.92 (0.79)  | 8.77 (8.41 - 9.20)    | 0.548                 |
| <i>CXCL11</i>      | 8.19 (0.83)  | 8.07 (7.63 - 8.66)    | 8.12 (0.81)  | 8.04 (7.56 - 8.56)    | <0.001 <sup>abc</sup> |
| <i>DNER</i>        | 8.96 (0.21)  | 8.97 (8.82 - 9.11)    | 9.08 (0.20)  | 9.08 (8.95 - 9.22)    | <0.001 <sup>abc</sup> |
| <i>ENRAGE</i>      | 1.84 (0.59)  | 1.77 (1.48 - 2.08)    | 2.22 (0.55)  | 2.16 (1.85 - 2.52)    | <0.001 <sup>abc</sup> |
| <i>FGF19</i>       | 7.94 (0.96)  | 7.90 (7.27 - 8.60)    | 7.92 (0.90)  | 7.89 (7.31 - 8.48)    | 0.708 <sup>a</sup>    |
| <i>FGF21</i>       | 3.78 (1.30)  | 3.68 (2.90 - 4.59)    | 3.71 (1.25)  | 3.68 (2.87 - 4.48)    | 0.348 <sup>a c</sup>  |
| <i>FGF23</i>       | 2.56 (0.53)  | 2.46 (2.24 - 2.74)    | 2.46 (0.35)  | 2.44 (2.24 - 2.63)    | 0.003 <sup>bc</sup>   |
| <i>Flt3L</i>       | 8.98 (0.38)  | 8.97 (8.74 - 9.19)    | 8.80 (0.36)  | 8.82 (8.57 - 9.03)    | <0.001 <sup>abc</sup> |
| <i>GDNF</i>        | 2.24 (0.43)  | 2.22 (1.96 - 2.46)    | 2.29 (0.31)  | 2.28 (2.09 - 2.48)    | <0.001 <sup>bc</sup>  |
| <i>HGF</i>         | 8.23 (0.41)  | 8.20 (7.95 - 8.47)    | 8.48 (0.37)  | 8.43 (8.22 - 8.69)    | <0.001 <sup>abc</sup> |
| <i>IFNgamma</i>    | 6.09 (1.09)  | 5.86 (5.45 - 6.43)    | 6.04 (1.08)  | 5.83 (5.40 - 6.36)    | 0.176                 |
| <i>IL6</i>         | 2.61 (0.60)  | 2.50 (2.20 - 2.89)    | 2.60 (0.63)  | 2.48 (2.18 - 2.88)    | 0.002 <sup>abc</sup>  |
| <i>IL7</i>         | 3.45 (0.61)  | 3.40 (3.06 - 3.76)    | 3.54 (0.60)  | 3.48 (3.18 - 3.86)    | 0.116 <sup>a</sup>    |
| <i>IL8</i>         | 4.46 (0.50)  | 4.42 (4.14 - 4.71)    | 4.64 (0.50)  | 4.57 (4.32 - 4.87)    | <0.001 <sup>bc</sup>  |
| <i>IL10</i>        | 3.90 (0.69)  | 3.81 (3.56 - 4.09)    | 3.95 (0.57)  | 3.87 (3.63 - 4.13)    | <0.001 <sup>abc</sup> |
| <i>IL10RB</i>      | 5.68 (0.25)  | 5.68 (5.52 - 5.84)    | 5.70 (0.26)  | 5.69 (5.53 - 5.86)    | 0.241 <sup>a</sup>    |
| <i>IL12B</i>       | 5.80 (0.56)  | 5.80 (5.42 - 6.16)    | 5.65 (0.52)  | 5.65 (5.31 - 6.00)    | <0.001 <sup>abc</sup> |
| <i>IL15RA</i>      | 1.34 (0.25)  | 1.33 (1.18 - 1.48)    | 1.45 (0.23)  | 1.44 (1.31 - 1.59)    | <0.001 <sup>ab</sup>  |
| <i>IL17A</i>       | 1.85 (0.53)  | 1.77 (1.51 - 2.09)    | 1.87 (0.53)  | 1.79 (1.53 - 2.08)    | 0.499 <sup>abc</sup>  |
| <i>IL18</i>        | 7.98 (0.50)  | 7.95 (7.66 - 8.30)    | 8.11 (0.51)  | 8.08 (7.81 - 8.41)    | <0.001 <sup>abc</sup> |
| <i>IL18R1</i>      | 8.13 (0.39)  | 8.13 (7.86 - 8.38)    | 8.21 (0.38)  | 8.21 (7.94 - 8.46)    | <0.001 <sup>abc</sup> |
| <i>LAPTGfbeta1</i> | 7.40 (0.38)  | 7.36 (7.15 - 7.60)    | 7.51 (0.41)  | 7.48 (7.25 - 7.71)    | <0.001 <sup>abc</sup> |
| <i>LIFR</i>        | 3.65 (0.24)  | 3.66 (3.49 - 3.80)    | 3.67 (0.19)  | 3.66 (3.54 - 3.78)    | 0.042 <sup>abc</sup>  |
| <i>MCP1</i>        | 10.88 (0.43) | 10.83 (10.61 - 11.08) | 11.04 (0.39) | 10.98 (10.79 - 11.21) | <0.001 <sup>abc</sup> |
| <i>MCP2</i>        | 8.22 (0.66)  | 8.25 (7.87 - 8.57)    | 8.41 (0.67)  | 8.46 (8.03 - 8.78)    | <0.001 <sup>abc</sup> |
| <i>MCP4</i>        | 12.76 (0.67) | 12.71 (12.33 - 13.16) | 13.03 (0.66) | 12.97 (12.59 - 13.41) | <0.001 <sup>abc</sup> |
| <i>MMP1</i>        | 9.09 (1.05)  | 9.03 (8.43 - 9.68)    | 9.33 (0.96)  | 9.28 (8.70 - 9.88)    | <0.001 <sup>abc</sup> |
| <i>MMP10</i>       | 8.13 (0.67)  | 8.05 (7.70 - 8.45)    | 8.14 (0.58)  | 8.08 (7.77 - 8.50)    | 0.358                 |

|                 |              |                       |              |                       |                       |
|-----------------|--------------|-----------------------|--------------|-----------------------|-----------------------|
| <i>NT3</i>      | 2.92 (0.42)  | 2.87 (2.69 - 3.05)    | 2.95 (0.39)  | 2.90 (2.71 - 3.11)    | 0.005 <sup>bc</sup>   |
| <i>OPG</i>      | 10.05 (0.37) | 10.01 (9.81 - 10.26)  | 9.91 (0.27)  | 9.92 (9.73 - 10.09)   | <0.001 <sup>abc</sup> |
| <i>OSM</i>      | 3.61 (1.02)  | 3.47 (2.84 - 4.30)    | 3.85 (0.95)  | 3.74 (3.15 - 4.48)    | <0.001 <sup>abc</sup> |
| <i>PDL1</i>     | 6.54 (0.39)  | 6.50 (6.31 - 6.69)    | 6.74 (0.38)  | 6.69 (6.51 - 6.91)    | <0.001 <sup>abc</sup> |
| <i>SCF</i>      | 8.96 (0.40)  | 9.02 (8.76 - 9.24)    | 9.11 (0.32)  | 9.13 (8.96 - 9.33)    | <0.001 <sup>abc</sup> |
| <i>SIRT2</i>    | 6.00 (1.03)  | 6.05 (5.40 - 6.67)    | 6.47 (1.07)  | 6.54 (5.96 - 7.16)    | <0.001 <sup>abc</sup> |
| <i>ST1A1</i>    | 3.53 (0.70)  | 3.55 (3.10 - 3.96)    | 3.92 (0.71)  | 3.94 (3.52 - 4.41)    | <0.001 <sup>abc</sup> |
| <i>STAMBP</i>   | 6.26 (0.90)  | 6.23 (5.73 - 6.79)    | 6.85 (0.96)  | 6.85 (6.36 - 7.45)    | <0.001 <sup>abc</sup> |
| <i>TGFalpha</i> | 3.11 (0.37)  | 3.05 (2.90 - 3.21)    | 3.15 (0.36)  | 3.07 (2.92 - 3.25)    | 0.016 <sup>bc</sup>   |
| <i>TNF</i>      | 3.05 (0.71)  | 2.88 (2.65 - 3.21)    | 3.10 (0.72)  | 2.96 (2.73 - 3.24)    | 0.002 <sup>abc</sup>  |
| <i>TNFB</i>     | 4.96 (0.43)  | 4.96 (4.73 - 5.22)    | 4.87 (0.42)  | 4.90 (4.65 - 5.09)    | <0.001 <sup>abc</sup> |
| <i>TNFRSF9</i>  | 6.70 (0.35)  | 6.70 (6.46 - 6.91)    | 6.84 (0.31)  | 6.82 (6.62 - 7.05)    | <0.001 <sup>abc</sup> |
| <i>TNFSF14</i>  | 4.00 (0.59)  | 3.92 (3.61 - 4.31)    | 4.27 (0.64)  | 4.17 (3.85 - 4.61)    | <0.001 <sup>abc</sup> |
| <i>TRAIL</i>    | 7.75 (0.36)  | 7.77 (7.52 - 7.98)    | 8.01 (0.28)  | 8.00 (7.83 - 8.18)    | <0.001 <sup>abc</sup> |
| <i>TRANCE</i>   | 4.56 (0.67)  | 4.60 (4.10 - 5.03)    | 4.92 (0.57)  | 4.94 (4.56 - 5.29)    | <0.001 <sup>abc</sup> |
| <i>TWEAK</i>    | 9.61 (0.37)  | 9.64 (9.38 - 9.86)    | 9.83 (0.28)  | 9.82 (9.64 - 10.00)   | <0.001 <sup>abc</sup> |
| <i>uPA</i>      | 10.11 (0.35) | 10.13 (9.88 - 10.36)  | 10.24 (0.28) | 10.24 (10.09 - 10.41) | 0.294 <sup>a</sup>    |
| <i>VEGFA</i>    | 10.24 (0.32) | 10.22 (10.03 - 10.43) | 10.26 (0.32) | 10.22 (10.05 - 10.44) | <0.001 <sup>abc</sup> |

Protein levels in NPX unit.

Linear regression model using normalized protein values (rank-based inverse normal transformation).

p-value at 0.05 FDR

<sup>a</sup> p-value <0.05 adjusted for percentage body fat

<sup>b</sup> p-value <0.05 adjusted for body mass index

<sup>c</sup> p-value <0.05 adjusted for visceral fat rating

sd, standard deviation; p25, 25<sup>th</sup> percentile; p75, 75<sup>th</sup> percentile

**Table S3.** Association between body composition measurements and protein levels

| <i>Protein</i> | <b>% Body Fat</b> |               |         |                | <b>Body Mass Index</b> |               |         |                | <b>Visceral Fat Rating</b> |               |         |                | <b>Waist Circumference</b> |               |         |                |
|----------------|-------------------|---------------|---------|----------------|------------------------|---------------|---------|----------------|----------------------------|---------------|---------|----------------|----------------------------|---------------|---------|----------------|
|                | <i>Coef</i>       | <i>95% CI</i> |         | <i>p-value</i> | <i>Coef</i>            | <i>95% CI</i> |         | <i>p-value</i> | <i>Coef</i>                | <i>95% CI</i> |         | <i>p-value</i> | <i>Coef</i>                | <i>95% CI</i> |         | <i>p-value</i> |
| <i>4EBP1</i>   | 0.19              | 0.13          | - 0.25  | <0.001         | 0.02                   | 0.01          | - 0.03  | <0.001         | 0.05                       | 0.03          | - 0.07  | <0.001         | 0.05                       | 0.03          | - 0.07  | <0.001         |
| <i>ADA</i>     | 0.17              | 0.10          | - 0.23  | <0.001         | 0.04                   | 0.03          | - 0.05  | <0.001         | 0.04                       | 0.03          | - 0.06  | <0.001         | 0.07                       | 0.05          | - 0.09  | <0.001         |
| <i>AXIN1</i>   | 0.20              | 0.14          | - 0.27  | <0.001         | 0.03                   | 0.02          | - 0.04  | <0.001         | 0.05                       | 0.03          | - 0.07  | <0.001         | 0.06                       | 0.04          | - 0.08  | <0.001         |
| <i>CASP8</i>   | 0.08              | 0.02          | - 0.14  | 0.019          | 0.01                   | 0.00          | - 0.02  | 0.009          | 0.02                       | 0.00          | - 0.03  | 0.050          | 0.02                       | 0.00          | - 0.04  | 0.035          |
| <i>CCL3</i>    | 0.42              | 0.36          | - 0.49  | <0.001         | 0.06                   | 0.05          | - 0.07  | <0.001         | 0.11                       | 0.09          | - 0.13  | <0.001         | 0.12                       | 0.10          | - 0.14  | <0.001         |
| <i>CCL4</i>    | 0.28              | 0.21          | - 0.34  | <0.001         | 0.04                   | 0.03          | - 0.05  | <0.001         | 0.08                       | 0.07          | - 0.10  | <0.001         | 0.09                       | 0.07          | - 0.11  | <0.001         |
| <i>CCL11</i>   | -0.16             | -0.22         | - -0.09 | <0.001         | -0.02                  | -0.03         | - -0.01 | <0.001         | -0.03                      | -0.05         | - -0.01 | <0.001         | -0.02                      | -0.05         | - 0.00  | 0.046          |
| <i>CCL19</i>   | 0.25              | 0.19          | - 0.32  | <0.001         | 0.04                   | 0.03          | - 0.05  | <0.001         | 0.07                       | 0.05          | - 0.08  | <0.001         | 0.09                       | 0.07          | - 0.11  | <0.001         |
| <i>CCL20</i>   | 0.12              | 0.06          | - 0.19  | 0.001          | 0.02                   | 0.01          | - 0.03  | 0.004          | 0.04                       | 0.02          | - 0.06  | <0.001         | 0.05                       | 0.03          | - 0.07  | <0.001         |
| <i>CCL23</i>   | -0.09             | -0.16         | - -0.02 | 0.010          | -0.02                  | -0.03         | - -0.01 | 0.004          | -0.02                      | -0.04         | - 0.00  | 0.023          | -0.03                      | -0.05         | - 0.00  | 0.035          |
| <i>CCL25</i>   | -0.07             | -0.14         | - -0.01 | 0.039          | -0.01                  | -0.02         | - 0.00  | 0.034          | -0.01                      | -0.03         | - 0.00  | 0.153          | -0.01                      | -0.04         | - 0.01  | 0.277          |
| <i>CCL28</i>   | -0.16             | -0.22         | - -0.09 | <0.001         | -0.03                  | -0.04         | - -0.02 | <0.001         | -0.04                      | -0.06         | - -0.03 | <0.001         | -0.06                      | -0.08         | - -0.03 | <0.001         |
| <i>CD5</i>     | 0.14              | 0.07          | - 0.21  | <0.001         | 0.03                   | 0.02          | - 0.04  | <0.001         | 0.04                       | 0.03          | - 0.06  | <0.001         | 0.06                       | 0.04          | - 0.08  | <0.001         |
| <i>CD6</i>     | 0.03              | -0.04         | - 0.09  | 0.449          | 0.01                   | 0.00          | - 0.02  | 0.055          | 0.01                       | 0.00          | - 0.03  | 0.090          | 0.03                       | 0.01          | - 0.05  | 0.013          |
| <i>CD8A</i>    | 0.04              | -0.03         | - 0.11  | 0.262          | 0.00                   | -0.01         | - 0.01  | 0.958          | 0.01                       | -0.01         | - 0.02  | 0.532          | 0.01                       | -0.01         | - 0.04  | 0.294          |
| <i>CD40</i>    | 0.21              | 0.14          | - 0.27  | <0.001         | 0.03                   | 0.02          | - 0.04  | <0.001         | 0.05                       | 0.03          | - 0.07  | <0.001         | 0.07                       | 0.05          | - 0.09  | <0.001         |
| <i>CD244</i>   | 0.10              | 0.04          | - 0.17  | 0.004          | 0.01                   | 0.00          | - 0.03  | 0.013          | 0.02                       | 0.00          | - 0.04  | 0.021          | 0.03                       | 0.01          | - 0.06  | 0.005          |
| <i>CDCP1</i>   | 0.49              | 0.42          | - 0.56  | <0.001         | 0.08                   | 0.07          | - 0.09  | <0.001         | 0.15                       | 0.13          | - 0.17  | <0.001         | 0.18                       | 0.15          | - 0.20  | <0.001         |
| <i>CSF1</i>    | 0.25              | 0.19          | - 0.32  | <0.001         | 0.04                   | 0.03          | - 0.05  | <0.001         | 0.07                       | 0.05          | - 0.09  | <0.001         | 0.08                       | 0.05          | - 0.10  | <0.001         |
| <i>CST5</i>    | -0.15             | -0.21         | - -0.08 | <0.001         | -0.03                  | -0.05         | - -0.02 | <0.001         | -0.03                      | -0.05         | - -0.02 | <0.001         | -0.06                      | -0.08         | - -0.03 | <0.001         |
| <i>CX3CL1</i>  | -0.11             | -0.17         | - -0.04 | 0.003          | -0.02                  | -0.03         | - -0.01 | <0.001         | -0.03                      | -0.05         | - -0.01 | 0.005          | -0.05                      | -0.07         | - -0.02 | <0.001         |
| <i>CXCL1</i>   | 0.13              | 0.07          | - 0.20  | <0.001         | 0.02                   | 0.01          | - 0.03  | 0.002          | 0.03                       | 0.01          | - 0.05  | 0.001          | 0.04                       | 0.01          | - 0.06  | 0.002          |
| <i>CXCL5</i>   | 0.17              | 0.11          | - 0.24  | <0.001         | 0.02                   | 0.01          | - 0.03  | <0.001         | 0.04                       | 0.02          | - 0.06  | <0.001         | 0.05                       | 0.03          | - 0.07  | <0.001         |

|                   |       |       |   |       |        |       |       |   |       |        |       |       |   |       |        |       |       |   |       |        |
|-------------------|-------|-------|---|-------|--------|-------|-------|---|-------|--------|-------|-------|---|-------|--------|-------|-------|---|-------|--------|
| <i>CXCL6</i>      | 0.13  | 0.06  | - | 0.20  | <0.001 | 0.02  | 0.01  | - | 0.03  | 0.002  | 0.03  | 0.01  | - | 0.05  | 0.001  | 0.03  | 0.01  | - | 0.06  | 0.003  |
| <i>CXCL9</i>      | 0.04  | -0.02 | - | 0.11  | 0.229  | 0.00  | -0.01 | - | 0.02  | 0.459  | 0.00  | -0.02 | - | 0.02  | 0.877  | 0.02  | 0.00  | - | 0.05  | 0.046  |
| <i>CXCL10</i>     | 0.15  | 0.08  | - | 0.21  | <0.001 | 0.03  | 0.02  | - | 0.04  | <0.001 | 0.04  | 0.02  | - | 0.05  | <0.001 | 0.05  | 0.03  | - | 0.07  | <0.001 |
| <i>CXCL11</i>     | 0.05  | -0.02 | - | 0.12  | 0.158  | 0.00  | -0.01 | - | 0.02  | 0.441  | 0.01  | 0.00  | - | 0.03  | 0.182  | 0.01  | -0.01 | - | 0.04  | 0.221  |
| <i>DNER</i>       | -0.19 | -0.26 | - | -0.13 | <0.001 | -0.02 | -0.03 | - | -0.01 | 0.001  | -0.04 | -0.06 | - | -0.02 | <0.001 | -0.06 | -0.08 | - | -0.04 | <0.001 |
| <i>ENRAGE</i>     | 0.09  | 0.02  | - | 0.15  | 0.010  | 0.02  | 0.01  | - | 0.03  | <0.001 | 0.03  | 0.02  | - | 0.05  | <0.001 | 0.04  | 0.01  | - | 0.06  | 0.001  |
| <i>FGF19</i>      | -0.11 | -0.18 | - | -0.04 | 0.002  | -0.02 | -0.03 | - | -0.01 | <0.001 | -0.03 | -0.05 | - | -0.01 | 0.014  | -0.03 | -0.06 | - | -0.01 | 0.015  |
| <i>FGF21</i>      | 0.33  | 0.27  | - | 0.40  | <0.001 | 0.04  | 0.02  | - | 0.05  | <0.001 | 0.09  | 0.07  | - | 0.10  | <0.001 | 0.09  | 0.06  | - | 0.11  | <0.001 |
| <i>FGF23</i>      | 0.23  | 0.16  | - | 0.30  | <0.001 | 0.03  | 0.02  | - | 0.04  | <0.001 | 0.07  | 0.05  | - | 0.09  | <0.001 | 0.08  | 0.06  | - | 0.10  | <0.001 |
| <i>Flt3L</i>      | -0.03 | -0.10 | - | 0.04  | 0.436  | 0.01  | -0.01 | - | 0.02  | 0.421  | 0.01  | -0.01 | - | 0.03  | 0.306  | 0.01  | -0.01 | - | 0.03  | 0.429  |
| <i>GDNF</i>       | -0.12 | -0.19 | - | -0.06 | 0.001  | -0.01 | -0.02 | - | 0.00  | 0.036  | -0.01 | -0.02 | - | 0.01  | 0.549  | -0.03 | -0.05 | - | -0.01 | 0.014  |
| <i>HGF</i>        | 0.34  | 0.27  | - | 0.40  | <0.001 | 0.06  | 0.05  | - | 0.07  | <0.001 | 0.11  | 0.09  | - | 0.12  | <0.001 | 0.12  | 0.10  | - | 0.14  | <0.001 |
| <i>IFNgamma</i>   | 0.09  | 0.03  | - | 0.16  | 0.009  | 0.02  | 0.01  | - | 0.03  | 0.001  | 0.02  | 0.00  | - | 0.03  | 0.029  | 0.04  | 0.02  | - | 0.06  | <0.001 |
| <i>IL6</i>        | 0.60  | 0.54  | - | 0.66  | <0.001 | 0.08  | 0.07  | - | 0.09  | <0.001 | 0.14  | 0.12  | - | 0.17  | <0.001 | 0.16  | 0.14  | - | 0.18  | <0.001 |
| <i>IL7</i>        | 0.20  | 0.14  | - | 0.27  | <0.001 | 0.03  | 0.02  | - | 0.04  | <0.001 | 0.05  | 0.04  | - | 0.07  | <0.001 | 0.07  | 0.04  | - | 0.09  | <0.001 |
| <i>IL8</i>        | 0.13  | 0.06  | - | 0.20  | <0.001 | 0.02  | 0.01  | - | 0.03  | 0.005  | 0.04  | 0.02  | - | 0.06  | <0.001 | 0.05  | 0.02  | - | 0.07  | <0.001 |
| <i>IL10</i>       | 0.12  | 0.05  | - | 0.18  | 0.001  | 0.02  | 0.01  | - | 0.03  | 0.003  | 0.03  | 0.01  | - | 0.05  | 0.002  | 0.05  | 0.02  | - | 0.07  | <0.001 |
| <i>IL10RB</i>     | 0.24  | 0.17  | - | 0.31  | <0.001 | 0.04  | 0.03  | - | 0.05  | <0.001 | 0.07  | 0.05  | - | 0.09  | <0.001 | 0.08  | 0.06  | - | 0.11  | <0.001 |
| <i>IL12B</i>      | 0.22  | 0.16  | - | 0.29  | <0.001 | 0.03  | 0.02  | - | 0.05  | <0.001 | 0.05  | 0.03  | - | 0.07  | <0.001 | 0.08  | 0.06  | - | 0.10  | <0.001 |
| <i>IL15RA</i>     | 0.08  | 0.02  | - | 0.15  | 0.018  | 0.02  | 0.01  | - | 0.03  | 0.003  | 0.02  | 0.01  | - | 0.04  | 0.006  | 0.04  | 0.02  | - | 0.06  | 0.001  |
| <i>IL17A</i>      | 0.06  | -0.01 | - | 0.13  | 0.114  | 0.01  | 0.00  | - | 0.02  | 0.255  | 0.01  | -0.01 | - | 0.03  | 0.190  | 0.03  | 0.01  | - | 0.06  | 0.005  |
| <i>IL18</i>       | 0.28  | 0.21  | - | 0.34  | <0.001 | 0.05  | 0.04  | - | 0.06  | <0.001 | 0.08  | 0.06  | - | 0.10  | <0.001 | 0.10  | 0.08  | - | 0.13  | <0.001 |
| <i>IL18R1</i>     | 0.49  | 0.42  | - | 0.56  | <0.001 | 0.07  | 0.06  | - | 0.09  | <0.001 | 0.14  | 0.11  | - | 0.16  | <0.001 | 0.15  | 0.13  | - | 0.17  | <0.001 |
| <i>LAPTFbeta1</i> | 0.13  | 0.07  | - | 0.20  | <0.001 | 0.03  | 0.02  | - | 0.04  | <0.001 | 0.05  | 0.03  | - | 0.07  | <0.001 | 0.06  | 0.03  | - | 0.08  | <0.001 |
| <i>LIFR</i>       | -0.29 | -0.35 | - | -0.22 | <0.001 | -0.03 | -0.04 | - | -0.02 | <0.001 | -0.05 | -0.07 | - | -0.03 | <0.001 | -0.06 | -0.08 | - | -0.03 | <0.001 |
| <i>MCP1</i>       | 0.13  | 0.06  | - | 0.19  | 0.001  | 0.03  | 0.02  | - | 0.04  | <0.001 | 0.05  | 0.03  | - | 0.07  | <0.001 | 0.06  | 0.04  | - | 0.08  | <0.001 |
| <i>MCP2</i>       | 0.07  | 0.01  | - | 0.14  | 0.042  | 0.01  | 0.00  | - | 0.02  | 0.180  | 0.02  | 0.00  | - | 0.04  | 0.063  | 0.02  | -0.01 | - | 0.04  | 0.146  |
| <i>MCP4</i>       | 0.10  | 0.03  | - | 0.16  | 0.009  | 0.02  | 0.01  | - | 0.03  | <0.001 | 0.05  | 0.03  | - | 0.06  | <0.001 | 0.05  | 0.03  | - | 0.07  | <0.001 |

|                 |       |       |   |       |        |       |       |   |       |        |       |       |   |       |        |       |       |   |       |        |
|-----------------|-------|-------|---|-------|--------|-------|-------|---|-------|--------|-------|-------|---|-------|--------|-------|-------|---|-------|--------|
| <i>MMP1</i>     | -0.03 | -0.10 | - | 0.04  | 0.407  | 0.00  | -0.01 | - | 0.01  | 0.894  | 0.01  | -0.01 | - | 0.03  | 0.253  | 0.00  | -0.02 | - | 0.03  | 0.691  |
| <i>MMP10</i>    | -0.06 | -0.12 | - | 0.01  | 0.131  | -0.01 | -0.03 | - | 0.00  | 0.014  | -0.02 | -0.04 | - | 0.00  | 0.032  | -0.01 | -0.04 | - | 0.01  | 0.263  |
| <i>NT3</i>      | -0.07 | -0.14 | - | 0.00  | 0.064  | -0.01 | -0.02 | - | 0.01  | 0.378  | -0.01 | -0.03 | - | 0.01  | 0.217  | 0.00  | -0.03 | - | 0.02  | 0.796  |
| <i>OPG</i>      | -0.04 | -0.11 | - | 0.02  | 0.219  | 0.00  | -0.01 | - | 0.01  | 0.890  | -0.01 | -0.02 | - | 0.01  | 0.532  | -0.01 | -0.03 | - | 0.01  | 0.429  |
| <i>OSM</i>      | 0.19  | 0.12  | - | 0.26  | <0.001 | 0.03  | 0.02  | - | 0.04  | <0.001 | 0.06  | 0.04  | - | 0.08  | <0.001 | 0.07  | 0.04  | - | 0.09  | <0.001 |
| <i>PDL1</i>     | 0.12  | 0.06  | - | 0.19  | 0.001  | 0.02  | 0.01  | - | 0.03  | <0.001 | 0.03  | 0.01  | - | 0.05  | 0.001  | 0.04  | 0.01  | - | 0.06  | 0.002  |
| <i>SCF</i>      | -0.19 | -0.26 | - | -0.11 | <0.001 | -0.03 | -0.04 | - | -0.02 | <0.001 | -0.06 | -0.08 | - | -0.04 | <0.001 | -0.05 | -0.08 | - | -0.03 | <0.001 |
| <i>SIRT2</i>    | 0.19  | 0.13  | - | 0.26  | <0.001 | 0.03  | 0.02  | - | 0.04  | <0.001 | 0.05  | 0.03  | - | 0.07  | <0.001 | 0.05  | 0.03  | - | 0.08  | <0.001 |
| <i>ST1A1</i>    | 0.11  | 0.04  | - | 0.17  | 0.002  | 0.01  | 0.00  | - | 0.02  | 0.019  | 0.02  | 0.00  | - | 0.04  | 0.050  | 0.03  | 0.00  | - | 0.05  | 0.024  |
| <i>STAMBP</i>   | 0.18  | 0.12  | - | 0.25  | <0.001 | 0.03  | 0.02  | - | 0.04  | <0.001 | 0.05  | 0.03  | - | 0.06  | <0.001 | 0.06  | 0.04  | - | 0.08  | <0.001 |
| <i>TGFalpha</i> | -0.04 | -0.11 | - | 0.03  | 0.253  | -0.01 | -0.02 | - | 0.00  | 0.184  | 0.00  | -0.01 | - | 0.02  | 0.685  | -0.01 | -0.03 | - | 0.02  | 0.655  |
| <i>TNF</i>      | 0.14  | 0.07  | - | 0.21  | <0.001 | 0.02  | 0.01  | - | 0.03  | 0.002  | 0.03  | 0.01  | - | 0.05  | 0.001  | 0.05  | 0.03  | - | 0.07  | <0.001 |
| <i>TNFB</i>     | -0.01 | -0.08 | - | 0.05  | 0.716  | 0.00  | -0.01 | - | 0.01  | 0.674  | -0.01 | -0.03 | - | 0.01  | 0.306  | 0.01  | -0.01 | - | 0.03  | 0.385  |
| <i>TNFRSF9</i>  | 0.08  | 0.01  | - | 0.15  | 0.030  | 0.02  | 0.01  | - | 0.03  | 0.001  | 0.03  | 0.01  | - | 0.04  | 0.008  | 0.05  | 0.03  | - | 0.07  | <0.001 |
| <i>TNFSF14</i>  | 0.27  | 0.21  | - | 0.34  | <0.001 | 0.04  | 0.03  | - | 0.05  | <0.001 | 0.08  | 0.06  | - | 0.09  | <0.001 | 0.09  | 0.07  | - | 0.11  | <0.001 |
| <i>TRAIL</i>    | 0.24  | 0.18  | - | 0.30  | <0.001 | 0.05  | 0.04  | - | 0.06  | <0.001 | 0.07  | 0.05  | - | 0.09  | <0.001 | 0.09  | 0.07  | - | 0.11  | <0.001 |
| <i>TRANCE</i>   | 0.29  | 0.23  | - | 0.35  | <0.001 | 0.04  | 0.03  | - | 0.06  | <0.001 | 0.07  | 0.05  | - | 0.09  | <0.001 | 0.11  | 0.08  | - | 0.13  | <0.001 |
| <i>TWEAK</i>    | -0.09 | -0.16 | - | -0.03 | 0.007  | -0.02 | -0.03 | - | -0.01 | 0.005  | -0.02 | -0.04 | - | -0.01 | 0.010  | -0.02 | -0.05 | - | 0.00  | 0.043  |
| <i>uPA</i>      | -0.06 | -0.13 | - | 0.01  | 0.115  | 0.01  | 0.00  | - | 0.02  | 0.274  | -0.01 | -0.02 | - | 0.01  | 0.613  | 0.01  | -0.01 | - | 0.04  | 0.244  |
| <i>VEGFA</i>    | 0.35  | 0.29  | - | 0.42  | <0.001 | 0.06  | 0.05  | - | 0.07  | <0.001 | 0.10  | 0.07  | - | 0.12  | <0.001 | 0.11  | 0.09  | - | 0.14  | <0.001 |

Linear regression model using normalized protein values (rank-based inverse normal transformation). Adjusted for sex, smoking, e-cigarette use, snuff use, and age at sampling.

Coefficients per 10% increase in %BF and 5cm increase in waist circumference.

p-value at 0.05 FDR.



**Table S4.** Association between %BF and protein levels stratified by three BMI categories

| <i>Protein</i>     | <i>Normal weight<br/>(18.5 to &lt;25 kg/ m<sup>2</sup>)<br/>Coef (95% CI)</i> | <i>Overweight<br/>(≥25 to &lt;30 kg/ m<sup>2</sup>)<br/>Coef (95% CI)</i> | <i>Obesity<br/>(≥30 kg/ m<sup>2</sup>)<br/>Coef (95% CI)</i> |
|--------------------|-------------------------------------------------------------------------------|---------------------------------------------------------------------------|--------------------------------------------------------------|
| <i>CCL3</i>        | 0.31 (0.21 - 0.51)                                                            | 0.61 (0.31 - 0.91)                                                        | 0.61 (0.21 - 1.01)                                           |
| <i>CCL20</i>       | 0.11 (0.01 - 0.21)                                                            | 0.31 (0.11 - 0.61)                                                        | 0.61 (0.21 - 1.11)                                           |
| <i>CDCP1</i>       | 0.31 (0.21 - 0.41)                                                            | 0.71 (0.41 - 1.01)                                                        | 0.71 (0.31 - 1.21)                                           |
| <i>DNER</i>        | -0.21 (-0.31 - -0.11)                                                         | -0.41 (-0.61 - -0.11)                                                     | -0.71 (-1.31 - -0.21)                                        |
| <i>FGF21</i>       | 0.31 (0.21 - 0.41)                                                            | 1.01 (0.71 - 1.21)                                                        | 0.61 (0.11 - 1.11)                                           |
| <i>FGF23</i>       | 0.11 (-0.11 - 0.21)                                                           | 0.51 (0.21 - 0.81)                                                        | 0.51 (0.11 - 0.91)                                           |
| <i>HGF</i>         | 0.11 (0.01 - 0.21)                                                            | 0.51 (0.31 - 0.71)                                                        | 0.61 (0.31 - 1.01)                                           |
| <i>IL6</i>         | 0.51 (0.41 - 0.61)                                                            | 0.81 (0.61 - 1.01)                                                        | 0.61 (0.31 - 0.91)                                           |
| <i>IL18</i>        | 0.11 (0.01 - 0.31)                                                            | 0.31 (0.11 - 0.61)                                                        | 0.51 (0.01 - 1.01)                                           |
| <i>LAPTGfbeta1</i> | 0.01 (-0.11 - 0.11)                                                           | 0.11 (-0.21 - 0.41)                                                       | 0.31 (-0.11 - 0.61)                                          |
| <i>MCP1</i>        | -0.11 (-0.21 - 0.01)                                                          | 0.11 (-0.11 - 0.41)                                                       | 0.51 (0.11 - 0.81)                                           |
| <i>MCP4</i>        | -0.11 (-0.21 - 0.01)                                                          | 0.01 (-0.31 - 0.21)                                                       | 0.21 (-0.21 - 0.71)                                          |
| <i>OSM</i>         | 0.01 (-0.11 - 0.11)                                                           | 0.01 (-0.31 - 0.31)                                                       | 0.31 (0.01 - 0.71)                                           |
| <i>TNFSF14</i>     | 0.21 (0.01 - 0.31)                                                            | 0.21 (-0.11 - 0.41)                                                       | 0.31 (-0.11 - 0.61)                                          |

**Table S5.** Association between %BF and protein levels adjusted for physical activity

| <i>Protein</i> | <i>Coef</i> | <i>95% CI</i> |         | <i>p-value</i> |
|----------------|-------------|---------------|---------|----------------|
| <i>4EBP1</i>   | 0.18        | 0.11          | - 0.25  | <0.001         |
| <i>ADA</i>     | 0.17        | 0.10          | - 0.24  | <0.001         |
| <i>AXIN1</i>   | 0.20        | 0.13          | - 0.27  | <0.001         |
| <i>CASP8</i>   | 0.08        | 0.01          | - 0.15  | 0.042          |
| <i>CCL3</i>    | 0.42        | 0.35          | - 0.49  | <0.001         |
| <i>CCL4</i>    | 0.26        | 0.19          | - 0.34  | <0.001         |
| <i>CCL11</i>   | -0.16       | -0.23         | - -0.08 | <0.001         |
| <i>CCL19</i>   | 0.24        | 0.16          | - 0.31  | <0.001         |
| <i>CCL20</i>   | 0.10        | 0.03          | - 0.18  | 0.012          |
| <i>CCL23</i>   | -0.08       | -0.15         | - 0.00  | 0.063          |
| <i>CCL25</i>   | -0.10       | -0.18         | - -0.03 | 0.009          |
| <i>CCL28</i>   | -0.14       | -0.21         | - -0.06 | 0.001          |
| <i>CD5</i>     | 0.13        | 0.05          | - 0.21  | 0.002          |
| <i>CD6</i>     | 0.02        | -0.06         | - 0.09  | 0.662          |
| <i>CD8A</i>    | 0.04        | -0.04         | - 0.11  | 0.388          |
| <i>CD40</i>    | 0.21        | 0.13          | - 0.28  | <0.001         |
| <i>CD244</i>   | 0.11        | 0.03          | - 0.19  | 0.007          |
| <i>CDCP1</i>   | 0.46        | 0.38          | - 0.54  | <0.001         |
| <i>CSF1</i>    | 0.24        | 0.17          | - 0.31  | <0.001         |
| <i>CST5</i>    | -0.15       | -0.23         | - -0.08 | <0.001         |
| <i>CX3CL1</i>  | -0.15       | -0.22         | - -0.07 | <0.001         |
| <i>CXCL1</i>   | 0.15        | 0.08          | - 0.23  | <0.001         |
| <i>CXCL5</i>   | 0.18        | 0.10          | - 0.25  | <0.001         |

|                    |       |       |   |       |        |
|--------------------|-------|-------|---|-------|--------|
| <i>CXCL6</i>       | 0.13  | 0.05  | - | 0.20  | 0.002  |
| <i>CXCL9</i>       | 0.04  | -0.03 | - | 0.11  | 0.311  |
| <i>CXCL10</i>      | 0.13  | 0.06  | - | 0.21  | 0.001  |
| <i>CXCL11</i>      | 0.05  | -0.02 | - | 0.13  | 0.179  |
| <i>DNER</i>        | -0.22 | -0.30 | - | -0.15 | <0.001 |
| <i>ENRAGE</i>      | 0.09  | 0.02  | - | 0.16  | 0.020  |
| <i>FGF19</i>       | -0.11 | -0.19 | - | -0.04 | 0.005  |
| <i>FGF21</i>       | 0.32  | 0.25  | - | 0.39  | <0.001 |
| <i>FGF23</i>       | 0.22  | 0.15  | - | 0.30  | <0.001 |
| <i>Flt3L</i>       | -0.03 | -0.11 | - | 0.05  | 0.442  |
| <i>GDNF</i>        | -0.15 | -0.22 | - | -0.07 | <0.001 |
| <i>HGF</i>         | 0.33  | 0.26  | - | 0.40  | <0.001 |
| <i>IFNgamma</i>    | 0.11  | 0.04  | - | 0.18  | 0.005  |
| <i>IL6</i>         | 0.59  | 0.53  | - | 0.66  | <0.001 |
| <i>IL7</i>         | 0.21  | 0.14  | - | 0.29  | <0.001 |
| <i>IL8</i>         | 0.12  | 0.05  | - | 0.20  | 0.003  |
| <i>IL10</i>        | 0.09  | 0.01  | - | 0.16  | 0.030  |
| <i>IL10RB</i>      | 0.23  | 0.15  | - | 0.30  | <0.001 |
| <i>IL12B</i>       | 0.22  | 0.14  | - | 0.29  | <0.001 |
| <i>IL15RA</i>      | 0.07  | 0.00  | - | 0.15  | 0.067  |
| <i>IL17A</i>       | 0.10  | 0.02  | - | 0.18  | 0.019  |
| <i>IL18</i>        | 0.28  | 0.21  | - | 0.35  | <0.001 |
| <i>IL18R1</i>      | 0.47  | 0.39  | - | 0.54  | <0.001 |
| <i>LAPTGFbeta1</i> | 0.13  | 0.05  | - | 0.20  | 0.002  |
| <i>LIFR</i>        | -0.31 | -0.38 | - | -0.24 | <0.001 |
| <i>MCP1</i>        | 0.10  | 0.03  | - | 0.17  | 0.012  |
| <i>MCP2</i>        | 0.07  | -0.01 | - | 0.15  | 0.082  |
| <i>MCP4</i>        | 0.08  | 0.00  | - | 0.16  | 0.063  |

|                 |       |       |   |       |        |
|-----------------|-------|-------|---|-------|--------|
| <i>MMP1</i>     | -0.03 | -0.11 | - | 0.04  | 0.424  |
| <i>MMP10</i>    | -0.06 | -0.14 | - | 0.02  | 0.169  |
| <i>NT3</i>      | -0.06 | -0.14 | - | 0.02  | 0.153  |
| <i>OPG</i>      | -0.06 | -0.13 | - | 0.02  | 0.146  |
| <i>OSM</i>      | 0.21  | 0.13  | - | 0.29  | <0.001 |
| <i>PDL1</i>     | 0.12  | 0.05  | - | 0.20  | 0.002  |
| <i>SCF</i>      | -0.19 | -0.27 | - | -0.11 | <0.001 |
| <i>SIRT2</i>    | 0.19  | 0.12  | - | 0.27  | <0.001 |
| <i>ST1A1</i>    | 0.11  | 0.04  | - | 0.19  | 0.006  |
| <i>STAMBP</i>   | 0.18  | 0.11  | - | 0.25  | <0.001 |
| <i>TGFalpha</i> | -0.05 | -0.13 | - | 0.03  | 0.226  |
| <i>TNF</i>      | 0.15  | 0.08  | - | 0.23  | <0.001 |
| <i>TNFB</i>     | -0.02 | -0.09 | - | 0.06  | 0.652  |
| <i>TNFRSF9</i>  | 0.07  | 0.00  | - | 0.15  | 0.066  |
| <i>TNFSF14</i>  | 0.27  | 0.20  | - | 0.35  | <0.001 |
| <i>TRAIL</i>    | 0.23  | 0.16  | - | 0.30  | <0.001 |
| <i>TRANCE</i>   | 0.28  | 0.21  | - | 0.35  | <0.001 |
| <i>TWEAK</i>    | -0.09 | -0.16 | - | -0.02 | 0.020  |
| <i>uPA</i>      | -0.08 | -0.16 | - | -0.01 | 0.039  |
| <i>VEGFA</i>    | 0.35  | 0.28  | - | 0.42  | <0.001 |

Linear regression model using normalized protein values (rank-based inverse normal transformation). Adjusted for sex, smoking, e-cigarette use, snuff use, age at sampling, and level of physical activity.

Coefficients per 10% increase in %BF.

p-value at 0.05 FDR.

n=1728

**Table S6.** Full and alternative protein names

| <i>Protein</i> | <i>Full name in Olink inflammation panel</i>                  | <i>Alternative names</i>                  |
|----------------|---------------------------------------------------------------|-------------------------------------------|
| <i>4EBP1</i>   | Eukaryotic translation initiation factor 4E-binding protein 1 |                                           |
| <i>ADA</i>     | Adenosine Deaminase                                           |                                           |
| <i>AXIN1</i>   | Axin-1                                                        |                                           |
| <i>CASP8</i>   | Caspase-8                                                     |                                           |
| <i>CCL3</i>    | C-C motif chemokine 3                                         | MIP-1 alpha                               |
| <i>CCL4</i>    | C-C motif chemokine 4                                         | MIP-1 beta                                |
| <i>CCL11</i>   | C-C motif chemokine 11                                        | Eotaxin-1, eosinophil chemotactic protein |
| <i>CCL19</i>   | C-C motif chemokine 19                                        | MIP-3 beta                                |
| <i>CCL20</i>   | C-C motif chemokine 20                                        | MIP-3 alpha, LARC                         |
| <i>CCL23</i>   | C-C motif chemokine 23                                        | MIP-3                                     |
| <i>CCL25</i>   | C-C motif chemokine 25                                        | TECK                                      |
| <i>CCL28</i>   | C-C motif chemokine 28                                        | MEC                                       |
| <i>CD5</i>     | Cluster of differentiation 5                                  |                                           |
| <i>CD6</i>     | Cluster of differentiation 6                                  |                                           |
| <i>CD8A</i>    | Cluster of differentiation 8a                                 |                                           |
| <i>CD40</i>    | Cluster of differentiation 40                                 | TNFRSF5                                   |
| <i>CD244</i>   | Natural Killer cell receptor 2B4                              | SLAMF4, CD244                             |
| <i>CD318</i>   | CUB domain-containing protein 1                               | CD318, TRASK                              |
| <i>CSF1</i>    | Macrophage colony-stimulating factor 1                        | M-CSF                                     |
| <i>CST5</i>    | Cystatin D                                                    |                                           |
| <i>CX3CL1</i>  | Fractalkine                                                   |                                           |
| <i>CXCL1</i>   | C-X-C motif chemokine 1                                       | Gro 1, Gro alpha                          |
| <i>CXCL5</i>   | C-X-C motif chemokine 5                                       | ENA-78                                    |
| <i>CXCL6</i>   | C-X-C motif chemokine 6                                       | GCP-2                                     |
| <i>CXCL9</i>   | C-X-C motif chemokine 9                                       | MIG                                       |
| <i>CXCL10</i>  | C-X-C motif chemokine 10                                      | IP-10                                     |

|                   |                                                               |                                      |
|-------------------|---------------------------------------------------------------|--------------------------------------|
| <i>CXCL11</i>     | C-X-C motif chemokine 11                                      | I-TAC                                |
| <i>DNER</i>       | Delta and Notch-like epidermal growth factor-related receptor |                                      |
| <i>ENRAGE</i>     | Protein S100-A12                                              |                                      |
| <i>FGF19</i>      | Fibroblast growth factor 19                                   |                                      |
| <i>FGF21</i>      | Fibroblast growth factor 21                                   |                                      |
| <i>FGF23</i>      | Fibroblast growth factor 23                                   |                                      |
| <i>Flt3L</i>      | Fms-related tyrosine kinase 3 ligand                          | FLT3LG                               |
| <i>GDNF</i>       | Glial cell line-derived neurotrophic factor                   |                                      |
| <i>HGF</i>        | Hepatocyte growth factor                                      |                                      |
| <i>IFNgamma</i>   | Interferon-gamma                                              |                                      |
| <i>IL6</i>        | Interleukin-6                                                 |                                      |
| <i>IL7</i>        | Interleukin-7                                                 |                                      |
| <i>IL8</i>        | Interleukin-8                                                 | CXCL8, Neutrophil chemotactic factor |
| <i>IL10</i>       | Interleukin-10                                                |                                      |
| <i>IL10RB</i>     | Interleukin-10 receptor beta                                  |                                      |
| <i>IL12B</i>      | Interleukin-12 subunit beta                                   |                                      |
| <i>IL15RA</i>     | Interleukin-15 receptor alpha                                 |                                      |
| <i>IL17A</i>      | Interleukin-17A                                               |                                      |
| <i>IL18</i>       | Interleukin-18                                                |                                      |
| <i>IL18R1</i>     | Interleukin-18 receptor 1                                     |                                      |
| <i>LAPTFbeta1</i> | Latency-associated peptide transforming growth factor beta-1  |                                      |
| <i>LIFR</i>       | Leukemia inhibitory factor receptor                           | CD118                                |
| <i>MCP1</i>       | Monocyte chemotactic protein 1                                | CCL2                                 |
| <i>MCP2</i>       | Monocyte chemotactic protein 2                                | CCL8                                 |
| <i>MCP4</i>       | Monocyte chemotactic protein 4                                | CCL13                                |
| <i>MMP1</i>       | Matrix metalloproteinase-1                                    |                                      |
| <i>MMP10</i>      | Matrix metalloproteinase-10                                   |                                      |

|                 |                                                     |                                  |
|-----------------|-----------------------------------------------------|----------------------------------|
| <i>NT3</i>      | Neurotrophin-3                                      |                                  |
| <i>OPG</i>      | Osteoprotegerin                                     | OCIF, TNFRSF11B                  |
| <i>OSM</i>      | Oncostatin-M                                        |                                  |
| <i>PDL1</i>     | Programmed cell death ligand 1                      | CD274, B7-H1                     |
| <i>SCF</i>      | Stem Cell Factor                                    | KIT-ligand                       |
| <i>SIRT2</i>    | SIR2-like protein 2                                 | Sirtuin 2                        |
| <i>ST1A1</i>    | Sulfotransferase 1A1                                | SULT1A1                          |
| <i>STAMBP</i>   | STAM-binding protein                                |                                  |
| <i>TGFalpha</i> | Transforming Growth Factor alpha                    |                                  |
| <i>TNF</i>      | Tumor necrosis factor                               | TNF alpha                        |
| <i>TNFB</i>     | Tumor necrosis factor beta                          | Lymphotoxin alpha                |
| <i>TNFRSF9</i>  | Tumor necrosis factor receptor superfamily member 9 | CD137, 4-1BB                     |
| <i>TNFSF14</i>  | Tumor necrosis factor ligand superfamily member 14  | CD258, LIGHT                     |
| <i>TRAIL</i>    | TNF-related apoptosis-inducing ligand               | CD253, TNFSF10                   |
| <i>TRANCE</i>   | TNF-related activation-induced cytokine             | CD254, TNFSF11, RANKL, OPGL, ODF |
| <i>TWEAK</i>    | TNF-related weak inducer of apoptosis               | TNFSF12, Apo3L                   |
| <i>uPA</i>      | Urokinase-type plasminogen activator                |                                  |
| <i>VEGFA</i>    | Vascular endothelial growth factor A                |                                  |

CD: Cluster of Differentiation
